# Supplementary material for: Population-scale long-read sequencing uncovers transposable elements associated with gene expression variation and adaptive signatures in Drosophila
Source: PubMed Central journal article supplement (PMC9005704; doi:10.1038/s41467-022-29518-8), 2022-04-12
Supplement: 41467_2022_29518_MOESM20_ESM.pdf [file 41467_2022_29518_MOESM20_ESM.pdf]

## Reporting Summary

Nature Portfolio wishes to improve the reproducibility of the work that we publish. This form provides structure for consistency and transparency in reporting. For further information on Nature Portfolio policies, see our [Editorial Policies](#) and the [Editorial Policy Checklist](#).

### Statistics

For all statistical analyses, confirm that the following items are present in the figure legend, table legend, main text, or Methods section.

- |                                     |                                                                                                                                                                                                                                                                                                |
|-------------------------------------|------------------------------------------------------------------------------------------------------------------------------------------------------------------------------------------------------------------------------------------------------------------------------------------------|
| n/a                                 | Confirmed                                                                                                                                                                                                                                                                                      |
| <input type="checkbox"/>            | <input checked="" type="checkbox"/> The exact sample size ( $n$ ) for each experimental group/condition, given as a discrete number and unit of measurement                                                                                                                                    |
| <input type="checkbox"/>            | <input checked="" type="checkbox"/> A statement on whether measurements were taken from distinct samples or whether the same sample was measured repeatedly                                                                                                                                    |
| <input type="checkbox"/>            | <input checked="" type="checkbox"/> The statistical test(s) used AND whether they are one- or two-sided<br><i>Only common tests should be described solely by name; describe more complex techniques in the Methods section.</i>                                                               |
| <input type="checkbox"/>            | <input checked="" type="checkbox"/> A description of all covariates tested                                                                                                                                                                                                                     |
| <input type="checkbox"/>            | <input checked="" type="checkbox"/> A description of any assumptions or corrections, such as tests of normality and adjustment for multiple comparisons                                                                                                                                        |
| <input type="checkbox"/>            | <input checked="" type="checkbox"/> A full description of the statistical parameters including central tendency (e.g. means) or other basic estimates (e.g. regression coefficient) AND variation (e.g. standard deviation) or associated estimates of uncertainty (e.g. confidence intervals) |
| <input type="checkbox"/>            | <input checked="" type="checkbox"/> For null hypothesis testing, the test statistic (e.g. $F$ , $t$ , $r$ ) with confidence intervals, effect sizes, degrees of freedom and $P$ value noted<br><i>Give <math>P</math> values as exact values whenever suitable.</i>                            |
| <input checked="" type="checkbox"/> | <input type="checkbox"/> For Bayesian analysis, information on the choice of priors and Markov chain Monte Carlo settings                                                                                                                                                                      |
| <input type="checkbox"/>            | <input checked="" type="checkbox"/> For hierarchical and complex designs, identification of the appropriate level for tests and full reporting of outcomes                                                                                                                                     |
| <input type="checkbox"/>            | <input checked="" type="checkbox"/> Estimates of effect sizes (e.g. Cohen's $d$ , Pearson's $r$ ), indicating how they were calculated                                                                                                                                                         |

*Our web collection on [statistics for biologists](#) contains articles on many of the points above.*

### Software and code

Policy information about [availability of computer code](#)

|                 |                                                                                                                                                                                                                                                                                                                                                                                                                                                                                                                                                                                                                                                                                                                                                                                                                                                                                                                                                     |
|-----------------|-----------------------------------------------------------------------------------------------------------------------------------------------------------------------------------------------------------------------------------------------------------------------------------------------------------------------------------------------------------------------------------------------------------------------------------------------------------------------------------------------------------------------------------------------------------------------------------------------------------------------------------------------------------------------------------------------------------------------------------------------------------------------------------------------------------------------------------------------------------------------------------------------------------------------------------------------------|
| Data collection | <input type="text" value="No software was used"/>                                                                                                                                                                                                                                                                                                                                                                                                                                                                                                                                                                                                                                                                                                                                                                                                                                                                                                   |
| Data analysis   | Albacore Sequencing Pipeline Software (v.2.2); NanoPlot (v.1.19); Canu (v.1.7); FinisherSC (v.2.1); SMRT Link v.5.0.1; Racon (v.1.0); Nanopolish (v.0.10.1); Pilon (v.1.22); GATK (v.4.0); bcftools stats (v.1.9); purge_haplotigs (v.1.0.1); MUMmer (v.4.0); RaGOO (v.1.02); minimap2 (v.2.9); MUMmer4 (v.4.0); BUSCO (v.3.0.2); MAFFT v.7.4; REPET package (v.2.5); PASTEC (v2.0); BLAT (v.35); RepeatMasker (v.3 and v.4); MUSCLE (v.3.5); Geneious (v.10.0.2); TEMP (v.1.05); TIDAL (v.1.0); BEDtools (v.2.18); minimap2 (v.2.9); UpSetR (v.1.3); VennDiagram (v.1.6); fastp package (v.0.20); salmon package (v.1.0.0); DESeq2 (v.1.28.1); QTLTools package (v.1.2); selscan (v.1.2.0a); GATK (v.4.0); SHAPEIT4 (v.4.1); DAVID (v.6.8) . <a href="https://github.com/gabyrech/deNovoTESDmel">https://github.com/gabyrech/deNovoTESDmel</a> ; <a href="https://github.com/sradiouy/deNovoTESDmel">https://github.com/sradiouy/deNovoTESDmel</a> |

For manuscripts utilizing custom algorithms or software that are central to the research but not yet described in published literature, software must be made available to editors and reviewers. We strongly encourage code deposition in a community repository (e.g. GitHub). See the Nature Portfolio [guidelines for submitting code & software](#) for further information.

### Data

Policy information about [availability of data](#)

All manuscripts must include a [data availability statement](#). This statement should provide the following information, where applicable:

- Accession codes, unique identifiers, or web links for publicly available datasets
- A description of any restrictions on data availability
- For clinical datasets or third party data, please ensure that the statement adheres to our [policy](#)

All the databases/datasets used in the study along with appropriately accessible links/accession codes are included in the manuscript under the "data availability" section as well as in this reporting summary. For example: all scaffolded assemblies and the raw data (long and short read sequencing) have been deposited in NCBI

under the BioProject accession PRJNA559813. The VCF file containing SNP callings for 46 *D. melanogaster* genomes used for testing positive selection evidences is available at <http://dx.doi.org/10.20350/digitalCSIC/13708>. Fasta sequences for the *D. melanogaster* Manually Curated Transposable Elements (MCTE) library are available at <http://dx.doi.org/10.20350/digitalCSIC/13765>. The new consensus sequences were deposited in Dfam (Storer et al 2021). Recombination rates according to Fiston-Lavier et al. (2010) and Comeron et al. (2012) for *D. melanogaster* genome release 6 are available at <http://dx.doi.org/10.20350/digitalCSIC/13766>. BED files containing Transposable Element (TE) annotations for 47 *Drosophila melanogaster* genomes are available at: <http://dx.doi.org/10.20350/digitalCSIC/13894>.

## Field-specific reporting

Please select the one below that is the best fit for your research. If you are not sure, read the appropriate sections before making your selection.

- Life sciences       Behavioural & social sciences       Ecological, evolutionary & environmental sciences

For a reference copy of the document with all sections, see [nature.com/documents/nr-reporting-summary-flat.pdf](https://www.nature.com/documents/nr-reporting-summary-flat.pdf)

## Life sciences study design

All studies must disclose on these points even when the disclosure is negative.

|                 |                                                                                                                                                                                                        |
|-----------------|--------------------------------------------------------------------------------------------------------------------------------------------------------------------------------------------------------|
| Sample size     | 32 genomes that represent European climates and one North American population were sequenced in this work. These genomes were chosen to represent the diversity of climatic regions present in Europe. |
| Data exclusions | No data were excluded from the analysis                                                                                                                                                                |
| Replication     | No replication of the sequencing genomes was performed. This is the standard in the field.                                                                                                             |
| Randomization   | No experimental groups                                                                                                                                                                                 |
| Blinding        | No group allocation                                                                                                                                                                                    |

## Reporting for specific materials, systems and methods

We require information from authors about some types of materials, experimental systems and methods used in many studies. Here, indicate whether each material, system or method listed is relevant to your study. If you are not sure if a list item applies to your research, read the appropriate section before selecting a response.

### Materials & experimental systems

| n/a                                 | Involved in the study                                           |
|-------------------------------------|-----------------------------------------------------------------|
| <input checked="" type="checkbox"/> | <input type="checkbox"/> Antibodies                             |
| <input checked="" type="checkbox"/> | <input type="checkbox"/> Eukaryotic cell lines                  |
| <input checked="" type="checkbox"/> | <input type="checkbox"/> Palaeontology and archaeology          |
| <input type="checkbox"/>            | <input checked="" type="checkbox"/> Animals and other organisms |
| <input checked="" type="checkbox"/> | <input type="checkbox"/> Human research participants            |
| <input checked="" type="checkbox"/> | <input type="checkbox"/> Clinical data                          |
| <input checked="" type="checkbox"/> | <input type="checkbox"/> Dual use research of concern           |

### Methods

| n/a                                 | Involved in the study                           |
|-------------------------------------|-------------------------------------------------|
| <input checked="" type="checkbox"/> | <input type="checkbox"/> ChIP-seq               |
| <input checked="" type="checkbox"/> | <input type="checkbox"/> Flow cytometry         |
| <input checked="" type="checkbox"/> | <input type="checkbox"/> MRI-based neuroimaging |

## Animals and other organisms

Policy information about [studies involving animals](#); [ARRIVE guidelines](#) recommended for reporting animal research

|                         |                                                                                       |
|-------------------------|---------------------------------------------------------------------------------------|
| Laboratory animals      | <i>Drosophila melanogaster</i> natural strains from Europe and North America          |
| Wild animals            | 5-10 day old <i>Drosophila melanogaster</i> female flies                              |
| Field-collected samples | Female flies were collected in the field and inbred lines were established in the lab |
| Ethics oversight        | No ethical approval was needed                                                        |

Note that full information on the approval of the study protocol must also be provided in the manuscript.
